# Supplementary material
Source: JCI journal article supplement (doi:10.1172/jci177819)
Supplement: sd1 [file 1]

# Supplemental Materials

## **Endothelial TDP-43 controls sprouting angiogenesis and vascular barrier integrity, and its deletion triggers neuroinflammation**

Victor Arribas *et al.*

\*Corresponding author. Email: [emontanez@ub.edu](mailto:emontanez@ub.edu)

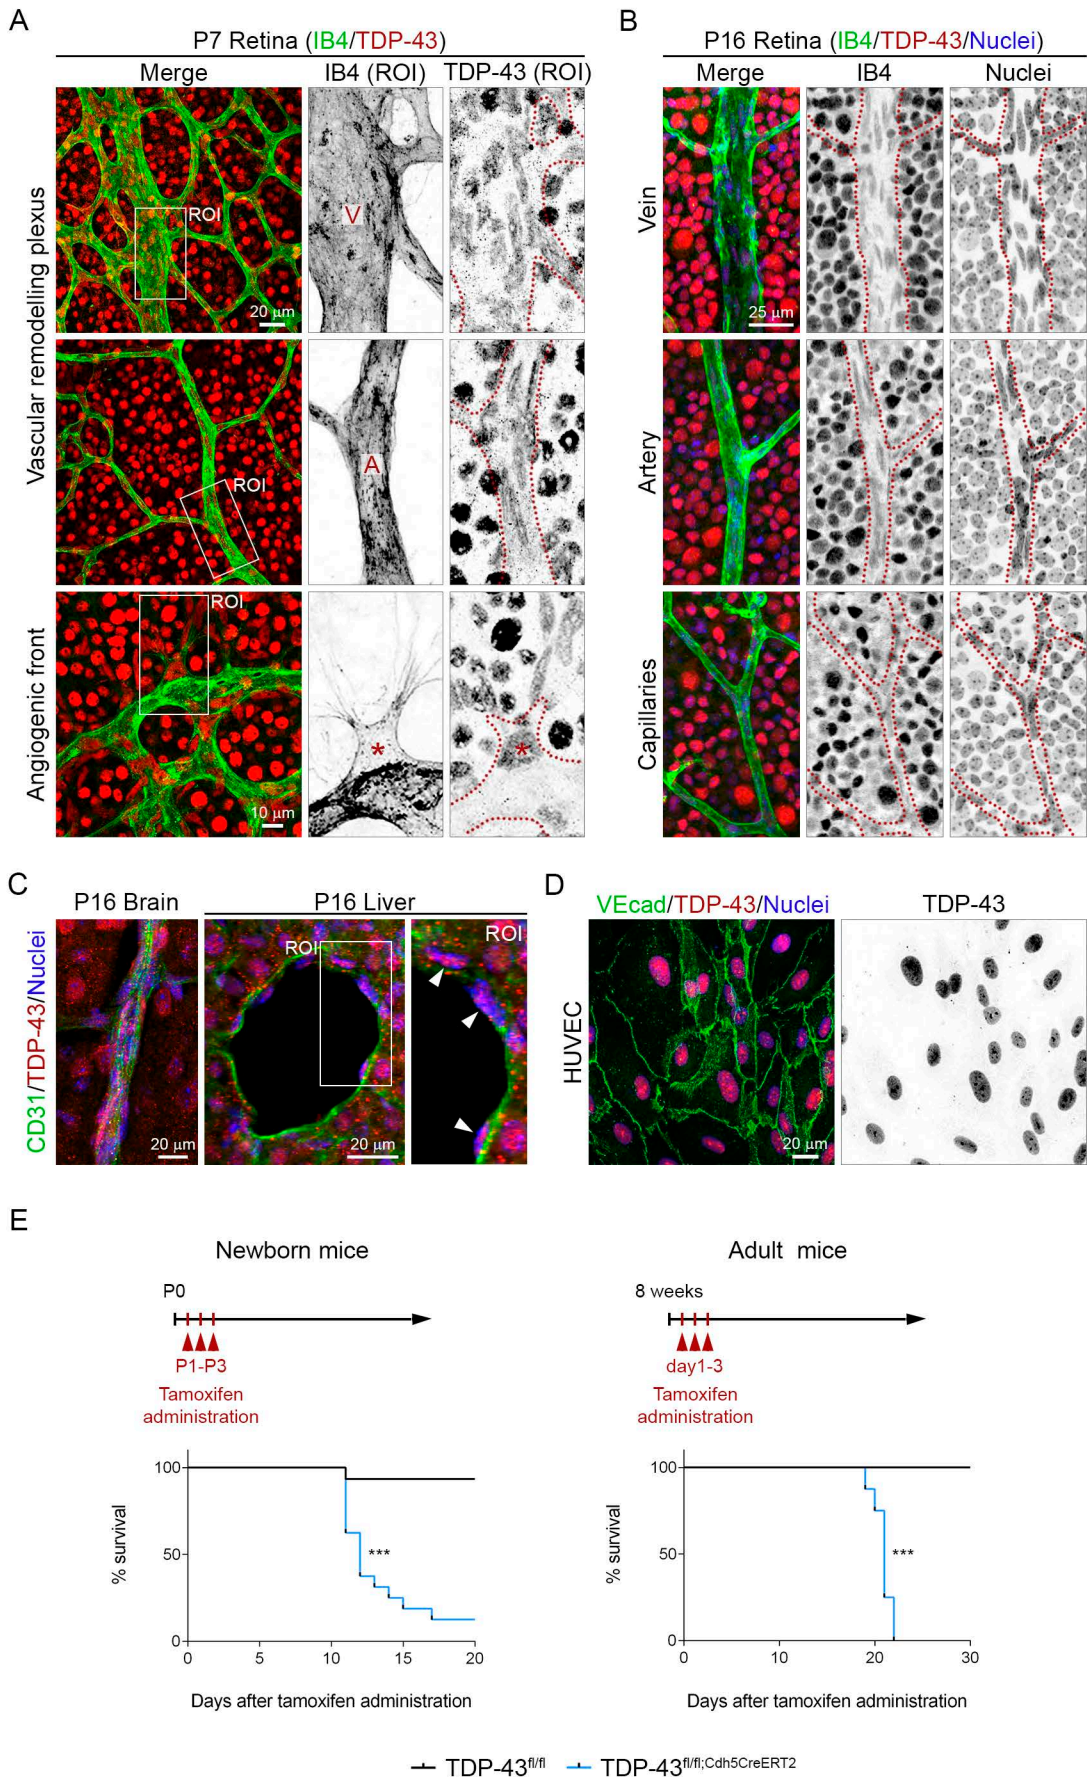

**Supplemental Figure 1. Expression of TDP-43 in the vasculature.** Confocal high-magnification images of P7 (A) and P16 (B) wild-type mouse retinas stained for IB4 (green), TDP-43 (red) and Hoechst (nuclei, blue). White rectangles indicate the magnified ROIs. Dotted lines highlight the endothelial border of the blood vessels. Veins (V), arteries (A) and sprouting ECs (asterisks) are indicated. (C) Confocal high-magnification images of P16 control mouse brain and liver sections stained for CD31 (green), TDP-43 (red) and Hoechst (nuclei, blue). White rectangle indicate the magnified ROI. (D) Confocal high-magnification images of HUVECs stained for VEcad (green), TDP-43 (red) and Hoechst (nuclei, blue). (E) Kaplan-Meier survival curve for newborn and adult *TDP-43<sup>fl/fl</sup>* and *TDP-43<sup>fl/fl</sup>;Cdh5CreERT2* mice. p values (\*\*\*) $p < 0.001$ . Log-rank (Mantel-Cox) test.

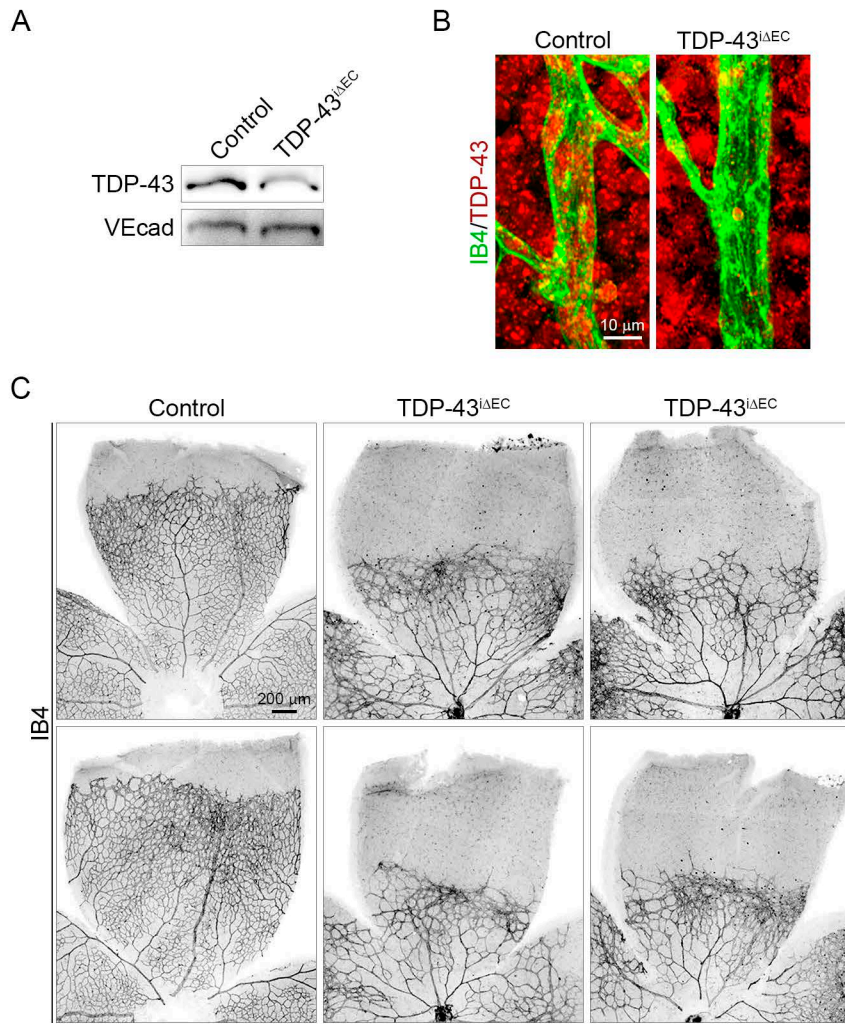

**Supplemental Figure 2. *Cdh5(PAC)-Cre<sup>ERT2</sup>*-mediated deletion of *Tdp-43* gene.** (A) Western blot analysis of TDP-43 in lung lysates from P6 control and *TDP-43<sup>iΔEC</sup>* mice three days after tamoxifen administration. VEcad was used as a loading control. (B) Confocal high-magnification images of P7 control and *TDP-43<sup>iΔEC</sup>* retinas stained for IB4 (green) and TDP-43 (red). (C) Confocal high-magnification images of P7 control and *TDP-43<sup>iΔEC</sup>* retinas stained for IB4.

A

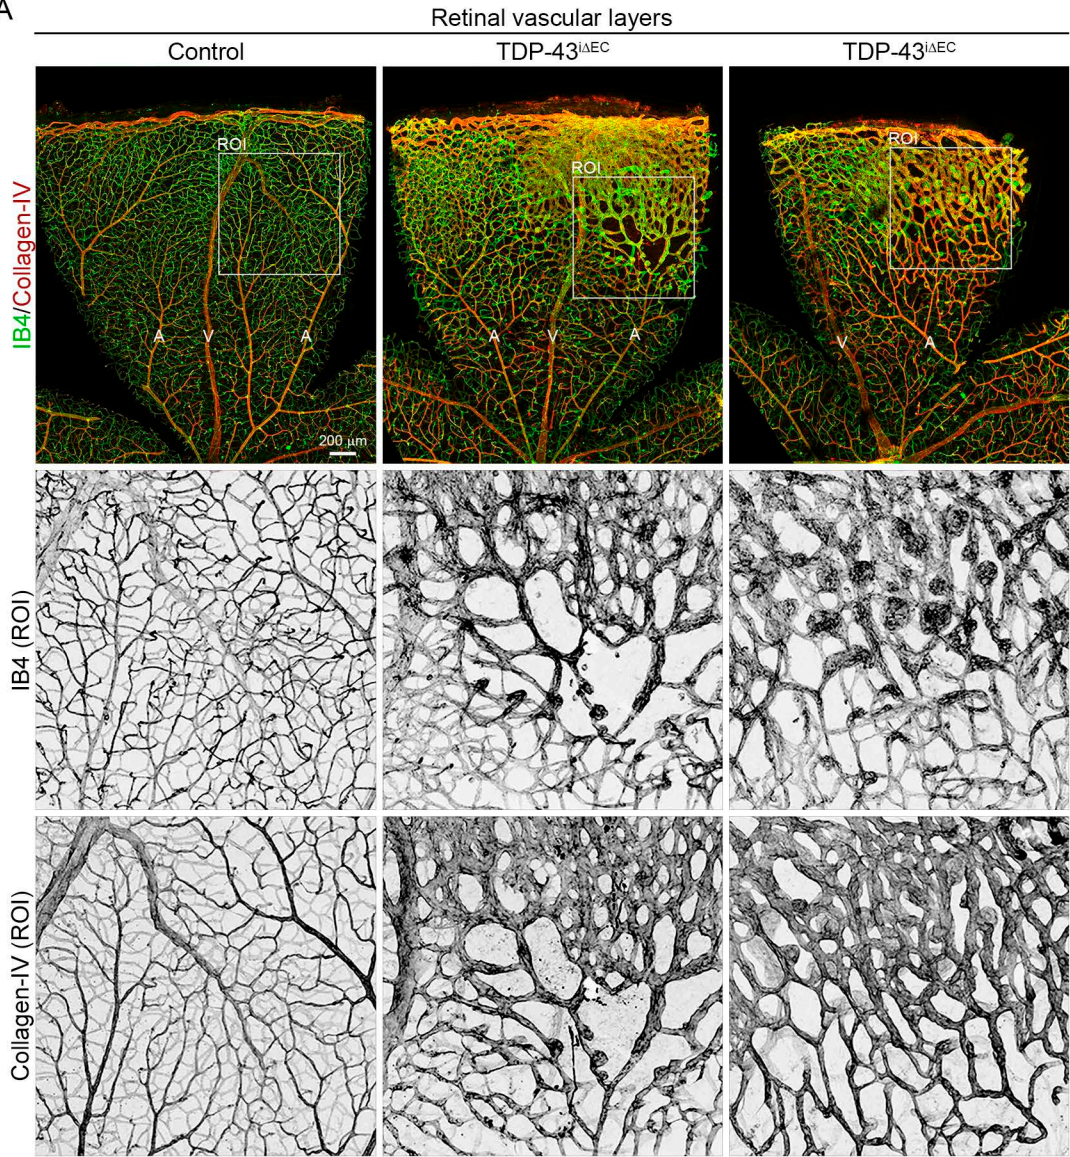

B

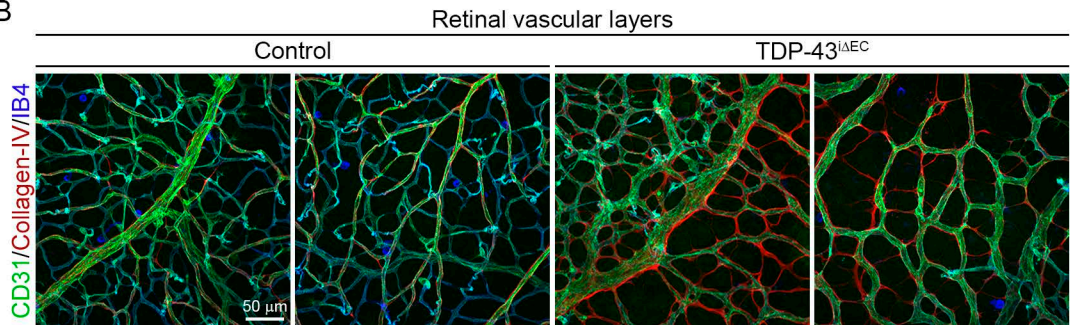

**Supplemental Figure 3. Vascular malformation in *TDP-43<sup>iΔEC</sup>* mice.** (A) Confocal high-magnification images of P16 control and *TDP-43<sup>iΔEC</sup>* retinas stained for IB4 (green) and Collagen-IV (red). White squares indicate the magnified ROIs. (B) Confocal high-magnification images of P16 control and *TDP-43<sup>iΔEC</sup>* retinas stained for CD31 (green), Collagen-IV (red) and IB4 (blue).

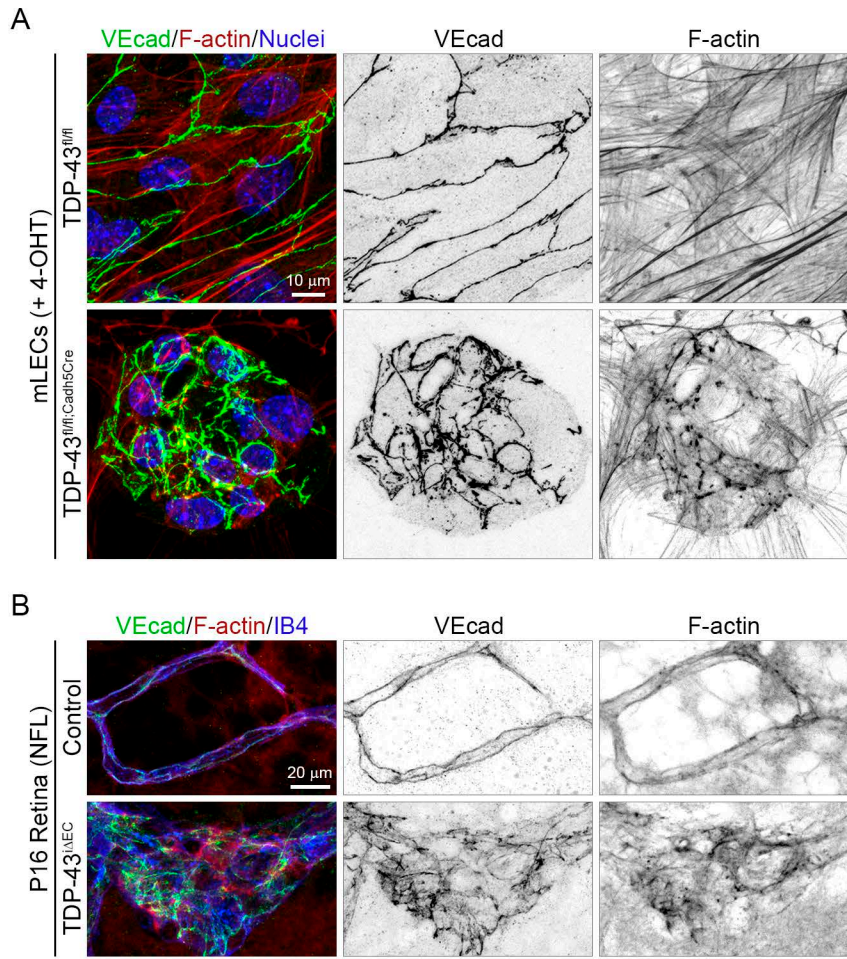

**Supplemental Figure 4. Loss of TDP-43 disrupts the endothelial adherens junctions. (A)** Confocal high magnification images of *TDP-43<sup>fl/fl</sup>* and *TDP-43<sup>fl/fl</sup>;Cadh5<sup>Cre</sup>* mLECs stained for VEcad (green), F-actin (red) and Hoechst (nuclei, blue). **(B)** Confocal high-magnification images of P16 control and *TDP-43<sup>iΔEC</sup>* retinas stained for VEcad (green), F-actin (red) and IB4 (blue).

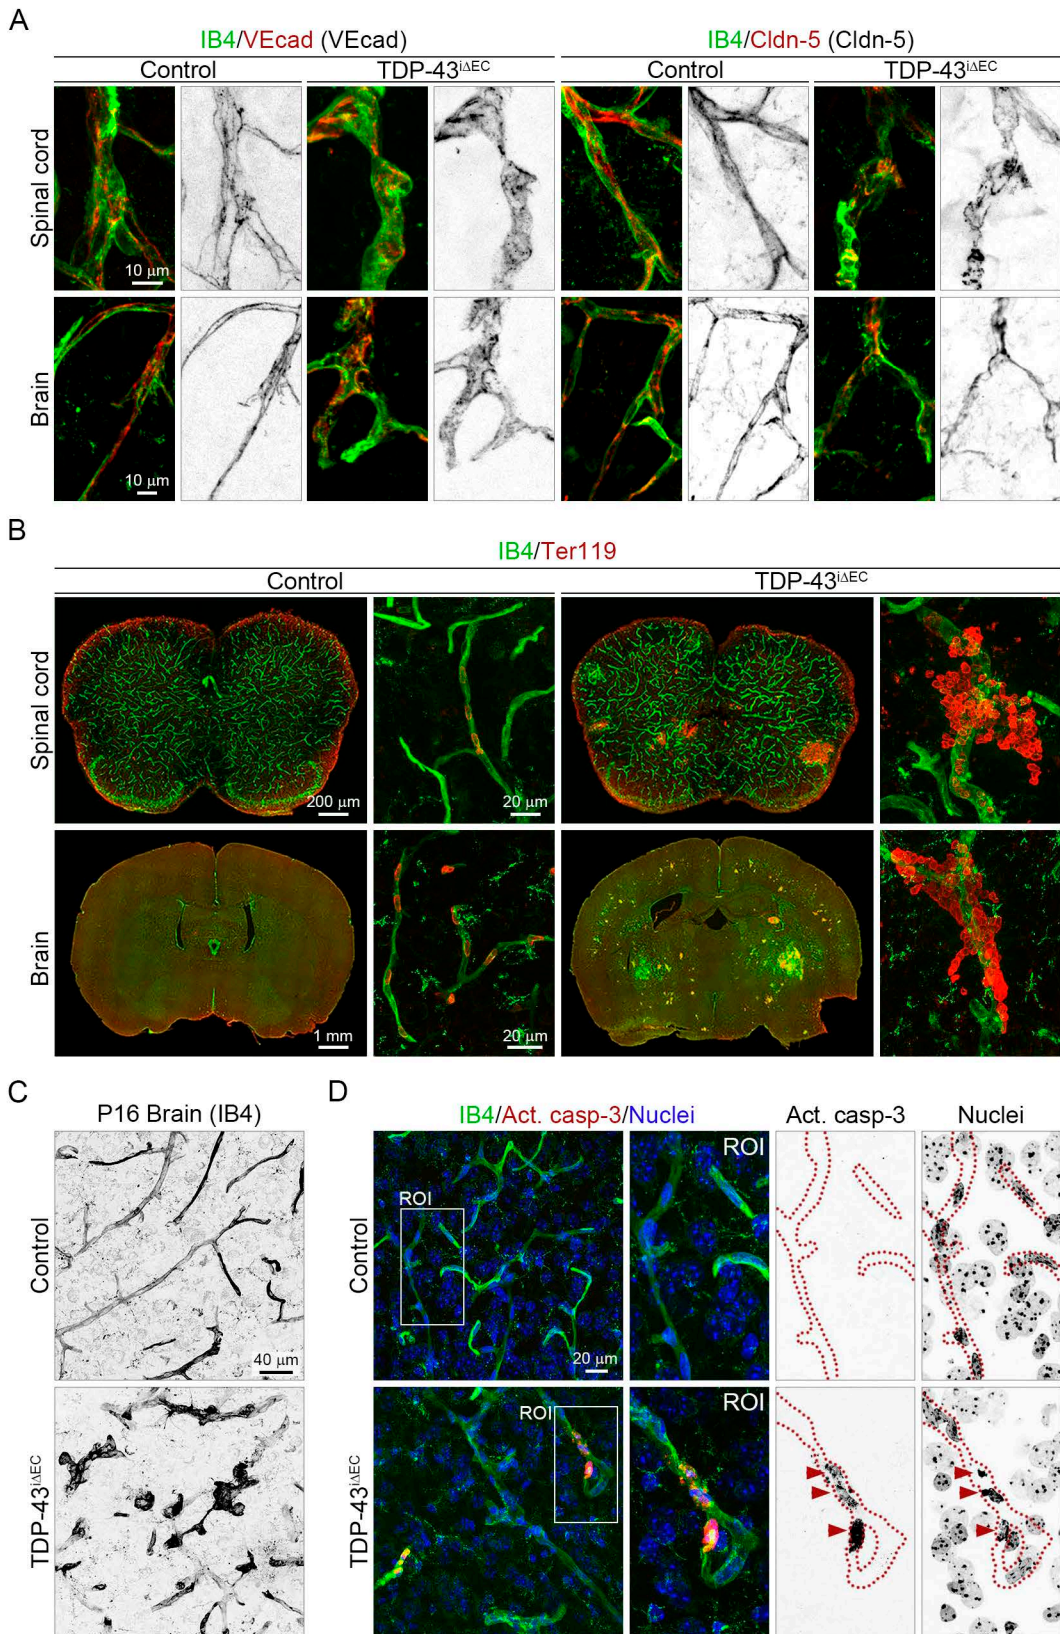

**Supplemental Figure 5. Loss of TDP-43 disrupts the blood-CNS barrier and triggers vascular degeneration in the CNS.** (A) Confocal high-magnification images of P16 control and *TDP-43<sup>iAEC</sup>* spinal cord and brain sections stained for IB4 (green), VEcad (red) and Cldn-5 (red). (B) Confocal images of P16 control and *TDP-43<sup>iAEC</sup>* spinal cord and brain sections stained for IB4 (green) and Ter119 (red), visualizing RBC leakage in *TDP-43<sup>iAEC</sup>* vessels. (C) Confocal high-magnification images of P16 control and *TDP-43<sup>iAEC</sup>* brain sections stained for IB4. Note the abnormal morphology of *TDP-43<sup>iAEC</sup>* brain vessels. (D) Confocal high-magnification images of P16 control and *TDP-43<sup>iAEC</sup>* brain sections stained for IB4 (green), Act. casp-3 (red) and Hoechst (nuclei, blue). White rectangles indicate magnified ROIs. Arrowheads indicate Act. casp-3 positive ECs. Dotted lines highlight the endothelial border of brain capillaries.

A

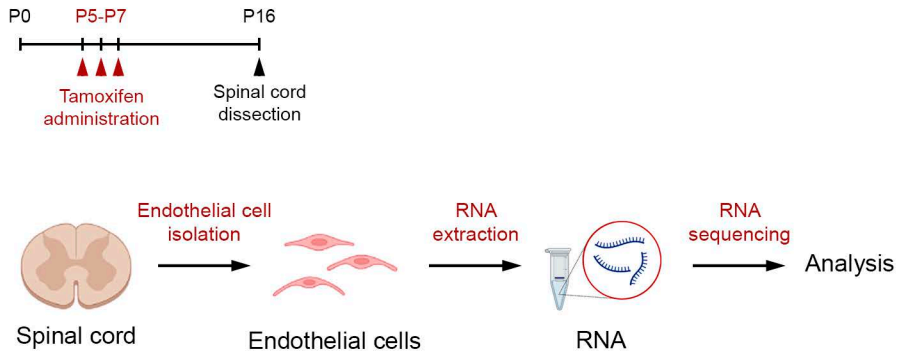

B

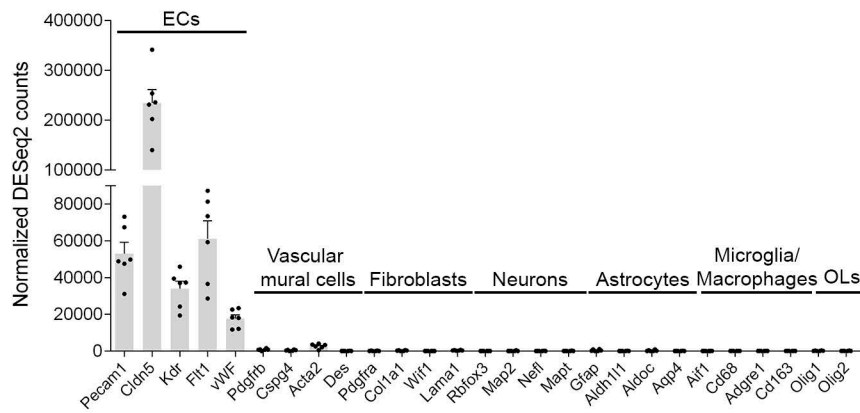

C

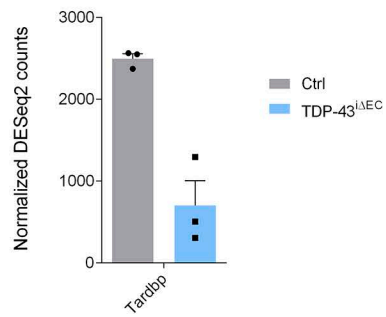

**Supplemental Figure 6. RNA sequencing analysis.** (A) Diagram depicting the experiment schedule for ECs isolation and RNA sequencing analysis from spinal cords of P16 control and *TDP-43<sup>iΔEC</sup>*. (B) Detailed comparison of expression levels for ECs, vascular mural cells, fibroblasts, neurons, astrocytes, microglia/macrophages and oligodendrocytes (OLs) canonical genes. (C) Detailed comparison of expression levels for *Tardbp* gene in ECs isolated from P16 control and *TDP-43<sup>iΔEC</sup>* spinal cords.

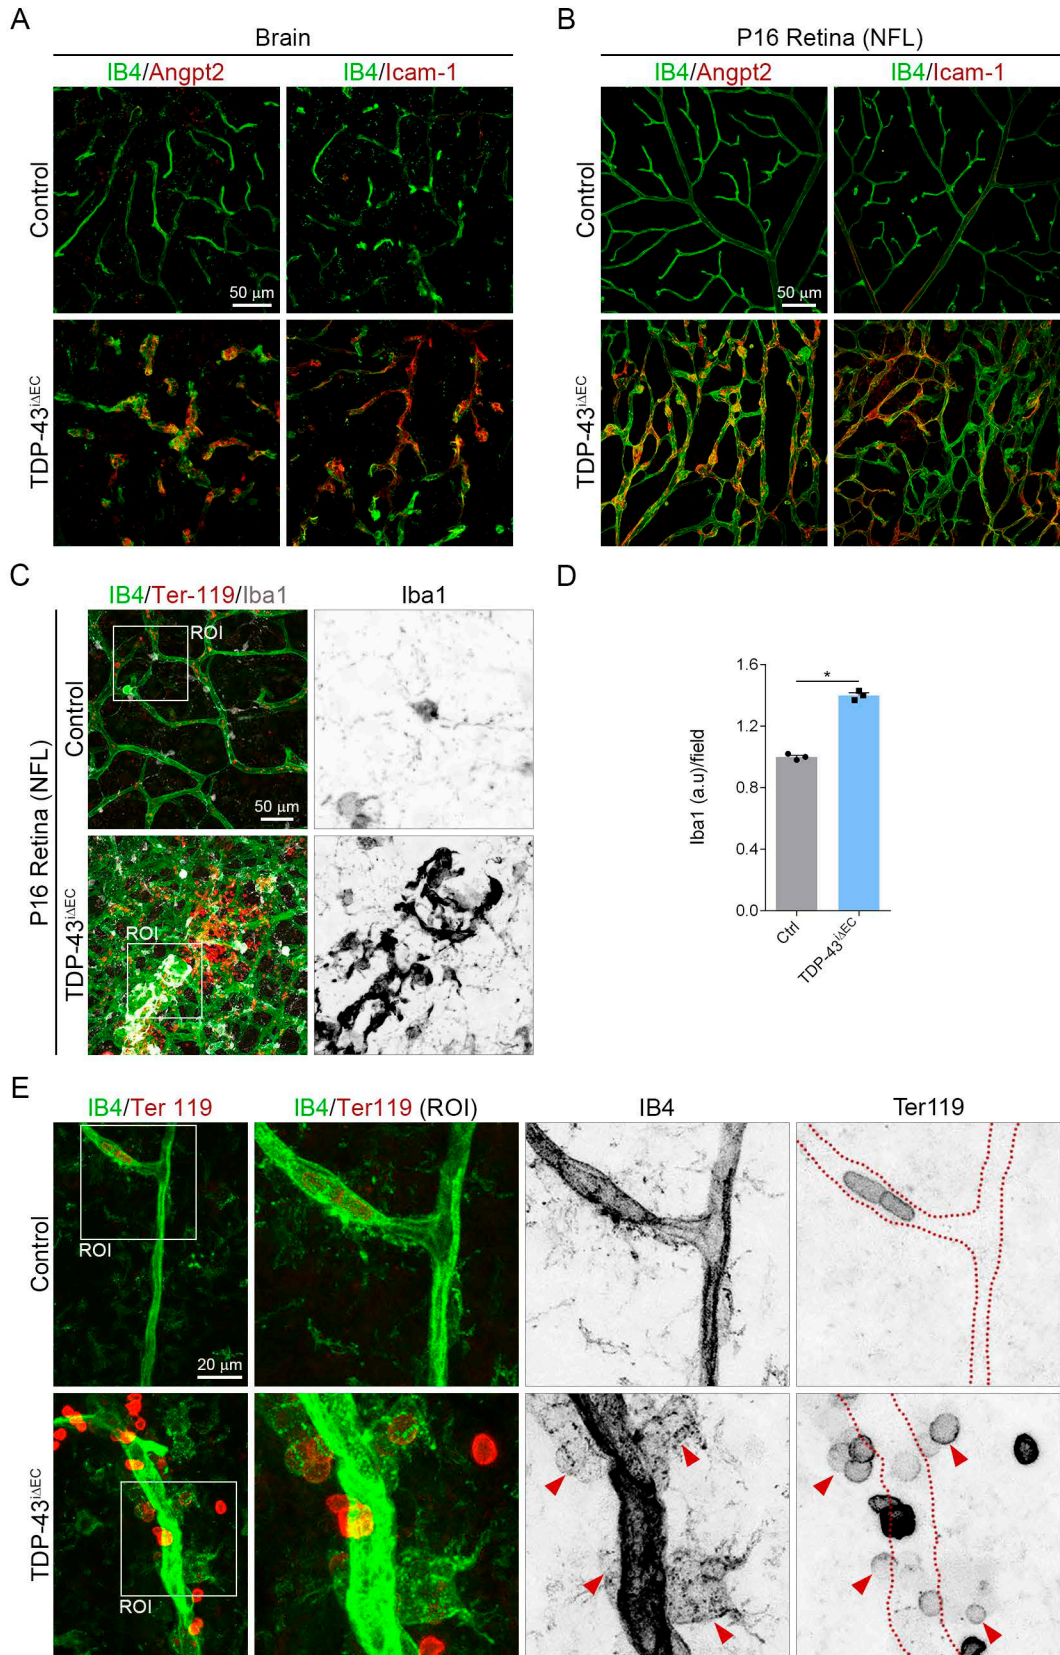

**Supplemental Figure 7. Inflammation in *TDP-43<sup>iAEC</sup>* brain and retina.** Confocal high-magnification images of IB4 (green), Angpt2 (red) and Icam-1 (red) in P16 brain (A) and retina (B). (C) Confocal high-magnification images of P16 control and *TDP-43<sup>iAEC</sup>* retinas stained for IB4 (green), Ter119 (red) and Iba1 (white). White squares indicate the magnified ROIs. Note the enhanced Iba1 staining in *TDP-43<sup>iAEC</sup>* samples and the morphological differences between Iba1+ cells from *TDP-43<sup>iAEC</sup>* and control retinas. (D) Quantification of Iba1 fluorescence intensity per field in control and *TDP-43<sup>iAEC</sup>* retinas as indicated. Error bars, s.e.m. p values (\* $p < 0.05$ ). Mann-Whitney U test. (E) Confocal high-magnification images of P7 control and *TDP-43<sup>iAEC</sup>* brain sections stained for IB4 (green) and Ter119 (red). White squares indicate the magnified ROIs. Note the presence of extravasated RBCs engulfed by IB4-positive macrophages (arrowheads) in *TDP-43<sup>iAEC</sup>* mice. Dotted lines highlight the endothelial border of the blood vessels.

**Supplemental Table 1. List of commercial antibodies and reagents.**

| <b>Antigen/staining reagent</b> | <b>Source, number</b>  | <b>Company</b>             | <b>Dilution</b>                                          |
|---------------------------------|------------------------|----------------------------|----------------------------------------------------------|
| $\beta$ -Catenin (D10A8)        | Rabbit, 8480           | Cell Signaling             | 1:100                                                    |
| CD31 (MEC 13.3)                 | Rat, 553370            | BD<br>PharMingen™          | -                                                        |
| Claudin 5                       | Rabbit, 34-1600        | ThermoFisher<br>Scientific | 1:100                                                    |
| Claudin 5 (4C3C2)               | Mouse, 35-2500         | ThermoFisher<br>Scientific | 1:100                                                    |
| Cleaved caspase-3               | Rabbit, 9661           | Cell Signaling             | 1:200                                                    |
| Collagen-IV                     | Rabbit, 2150-<br>1470  | Bio-Rad                    | 1:200                                                    |
| Fibronectin                     | Rabbit, F3648          | Sigma Aldrich              | 1:100                                                    |
| GAPDH                           | Mouse, MAB374          | Chemicon                   | 1:1000                                                   |
| GFAP                            | Rabbit, Z0334          | Dako                       | 1:250                                                    |
| Hoechst 33342                   | H3570                  | Invitrogen                 | 1: 5000                                                  |
| Icam-1                          | Rabbit, ab222736       | Abcam                      | 1:100                                                    |
| Iba1                            | Rabbit, 019-<br>19741  | Wako                       | 1:1000                                                   |
| Ki67                            | Rabbit, ab16667        | Abcam                      | 1:100                                                    |
| mAngiopoietin-2                 | Sheep, AF7186          | R&D Systems                | 1:100                                                    |
| Plvap                           | Rat, 550563            | BD<br>PharMingen™          | 1:100                                                    |
| TDP-43                          | Rabbit, 10782-2-<br>AP | Proteintech                | 1:100 (IF mice),<br>1:500 (IF<br>HUVECs),<br>1:5000 (WB) |
| Ter119                          | Rat, MAB1125           | R&D Systems                | 1:100                                                    |
| $\alpha$ -Tubulin (DM1A)        | Mouse, CP06            | Calbiochem                 | 1:1000                                                   |
| VE-cadherin (16B1)              | Mouse, 14-1449-<br>82  | ThermoFisher<br>Scientific | 1:100                                                    |
| VE-cadherin                     | Rat, 14-1442-85        | Invitrogen                 | 1:100                                                    |
| ERG Alexa Fluor-647             | Rabbit, ab196149       | Abcam                      | 1:100                                                    |
| Paxillin                        | Mouse, 610051          | BD<br>PharMingen™          | 1:100                                                    |
| Phalloidin Alexa Fluor-633      | A2284                  | Invitrogen                 | 1:500 (IF<br>HUVECs), 1:100<br>(IF mice)                 |
| Isolectin-B4 Alexa Fluor-488    | I21411                 | Invitrogen                 | 1:150                                                    |
| Mouse Alexa Fluor-546           | Donkey, A10036         | Invitrogen                 | 1: 500                                                   |
| Rabbit Alexa Fluor-488          | Chicken, A21441        | Invitrogen                 | 1: 500                                                   |
| Rabbit Alexa Fluor-546          | Donkey, A10040         | Invitrogen                 | 1:500                                                    |

|                                                    |                |                   |        |
|----------------------------------------------------|----------------|-------------------|--------|
| Rabbit Alexa Fluor-633                             | Goat, A21070   | Invitrogen        | 1:500  |
| Rat Alexa Fluor-546                                | Goat, A11081   | Invitrogen        | 1:500  |
| Rat Alexa Fluor-633                                | Goat, A21094   | Invitrogen        | 1:500  |
| Sheep Alexa Fluor-546                              | Donkey, A21098 | Invitrogen        | 1:500  |
| APC Rat IgG2a $\kappa$ Isotype Control             | 553932         | BD<br>Pharmlngen™ | 1:1000 |
| APC Rat Anti-mouse CD31<br>(Clone: MEC 13.3)       | 561815         | BD<br>Pharmlngen™ | 1:1000 |
| PE-Cy™7 Mouse IgG1 $\kappa$<br>Isotype Control     | 557646         | BD<br>Pharmlngen™ | 1:1000 |
| PE-Cy™7 Rat Anti-mouse CD45<br>(Clone: 30-F11)     | 552848         | BD<br>Pharmlngen™ | 1:1000 |
| PE-Cy™7 Rat Anti-mouse TER-<br>119/Erythroid cells | 557853         | BD<br>Pharmlngen™ | 1:1000 |
